# Supplementary figures and images for: Bile acid composition regulates GPR119-dependent intestinal lipid sensing and food intake regulation in mice
Source: HighWire-hosted journal article supplement (doi:10.1136/gutjnl-2019-319693), 2020-02-28

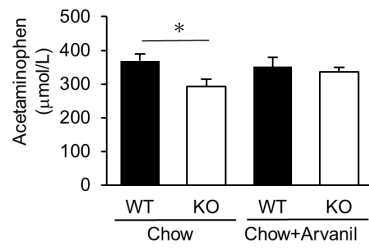

Figure S5

Supplement: gutjnl-2019-319693supp006_data_supplement.pdf [file gutjnl-2019-319693supp006_data_supplement.pdf]
